# Supplementary material for: The deubiquitinase ZRANB1 is an E3 ubiquitin ligase for SLC7A11 and regulates ferroptotic resistance
Source: PubMed Central journal article supplement — J Cell Biol. 2023 Oct 13;222(11):e202212072. doi: 10.1083/jcb.202212072 (PMC10570852; doi:10.1083/jcb.202212072), 2023-10-13

Figure 5A

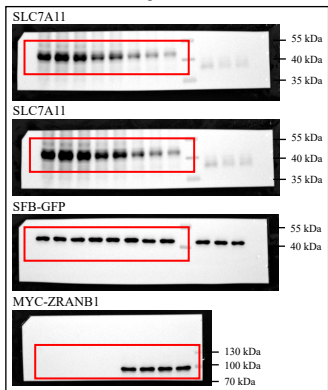

Figure 5B

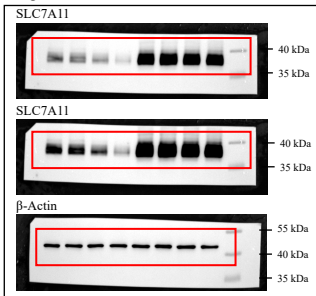

Figure 5C

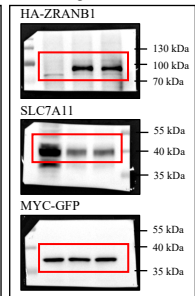

Figure 5D

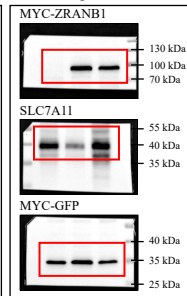

Figure 5E

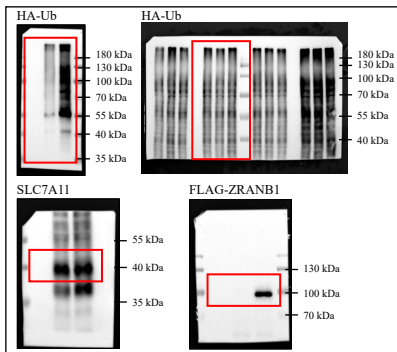

Figure 5F

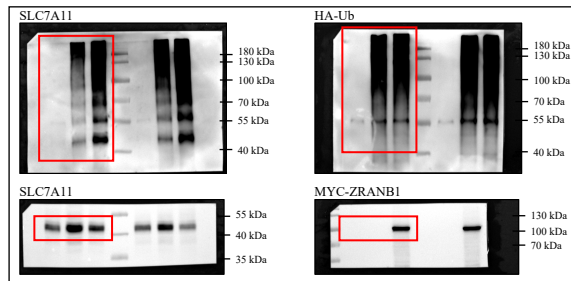

Figure 5I

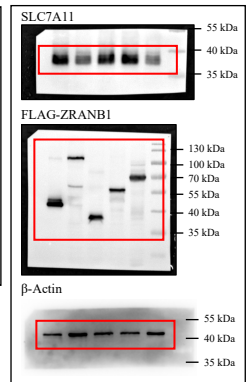

Figure 5G and J

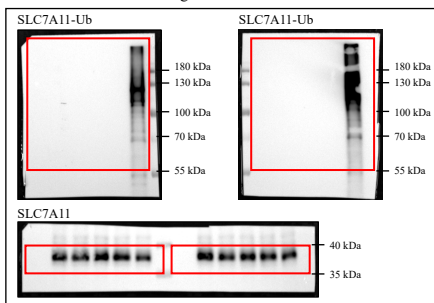

Figure 5L

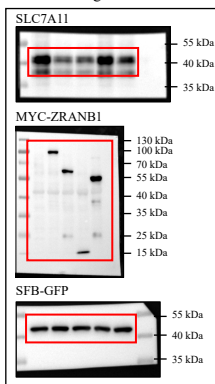

Figure 5N

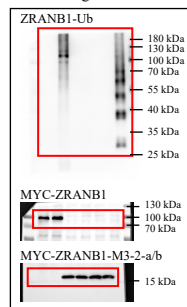

Figure 5P

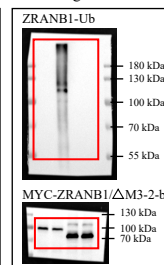

Supplement: JCB_202212072_SourceDataF5.pdf [file JCB_202212072_SourceDataF5.pdf]
