# Supplementary material for: The deubiquitinase ZRANB1 is an E3 ubiquitin ligase for SLC7A11 and regulates ferroptotic resistance
Source: PubMed Central journal article supplement — J Cell Biol. 2023 Oct 13;222(11):e202212072. doi: 10.1083/jcb.202212072 (PMC10570852; doi:10.1083/jcb.202212072), 2023-10-13

Figure S5B

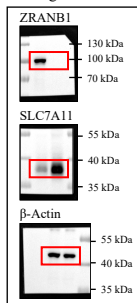

Figure S5D

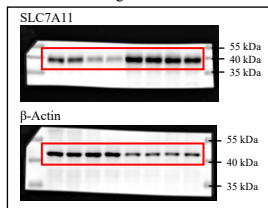

Figure S5F

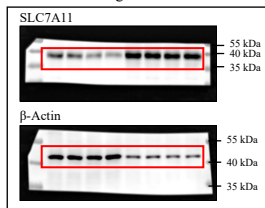

Figure S5H

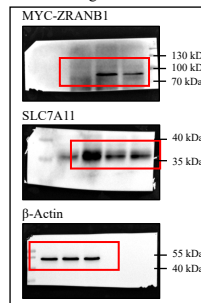

Figure S5I

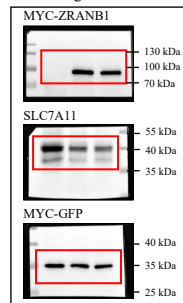

Figure S5J

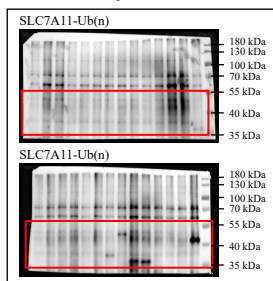

Figure S5K

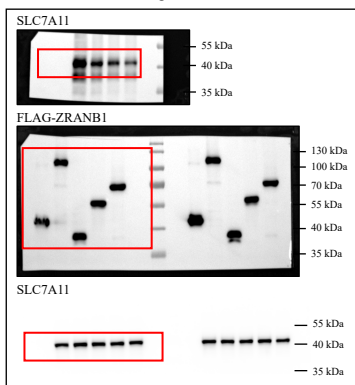

Figure S5L

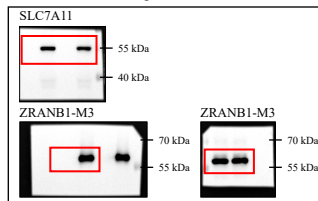

Figure S5M

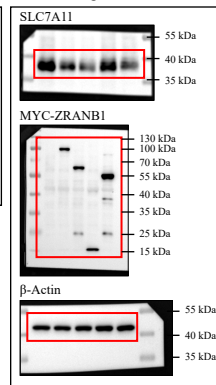

Figure S5N

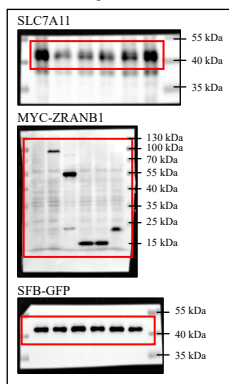

Figure S5O

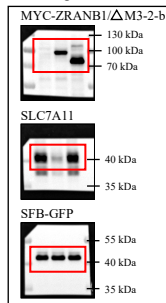

Supplement: JCB_202212072_SourceDataFS5.pdf [file JCB_202212072_SourceDataFS5.pdf]
