# Supplementary figures and images for: The deubiquitinase ZRANB1 is an E3 ubiquitin ligase for SLC7A11 and regulates ferroptotic resistance
Source: PubMed Central journal article supplement — J Cell Biol. 2023 Oct 13;222(11):e202212072. doi: 10.1083/jcb.202212072 (PMC10570852; doi:10.1083/jcb.202212072), 2023-10-13

Figure 4A

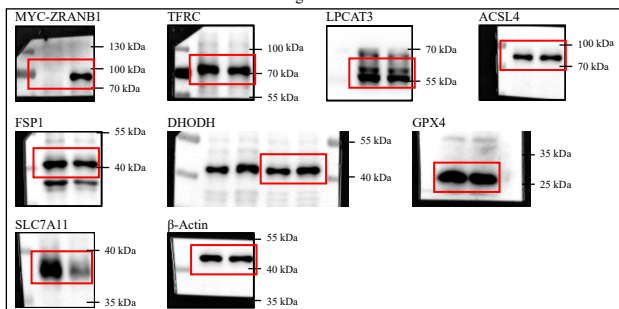

Figure 4F

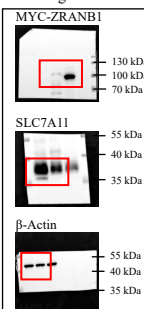

Figure 4H

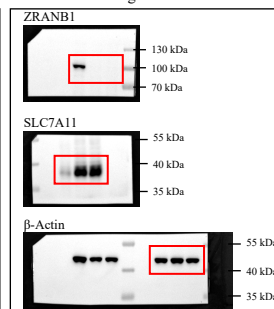

Figure 4I

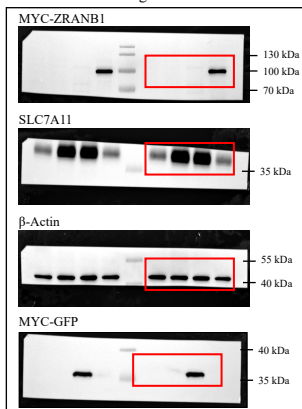

Figure 4L and O

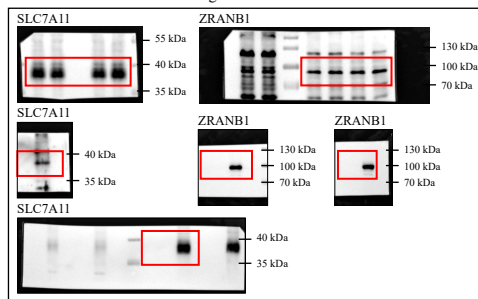

Figure 4M

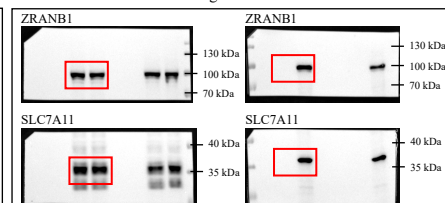

Figure 4N

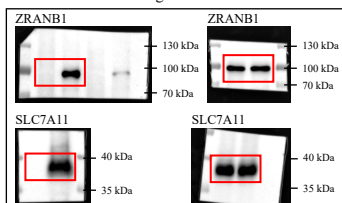

Figure 4P

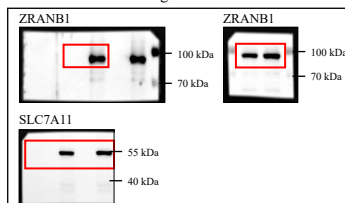

Supplement: JCB_202212072_SourceDataF4.pdf [file JCB_202212072_SourceDataF4.pdf]

Figure 6A

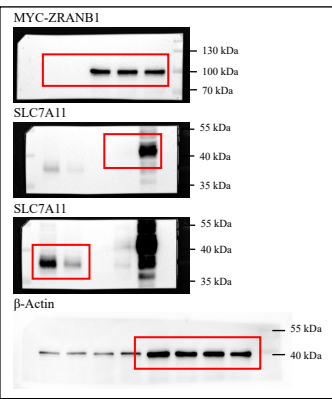

Figure 6K

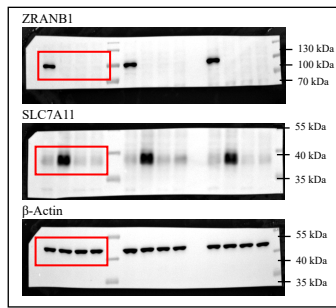

Supplement: JCB_202212072_SourceDataF6.pdf [file JCB_202212072_SourceDataF6.pdf]

Figure S2A

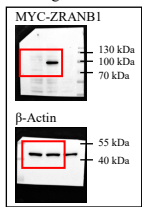

Figure S2B

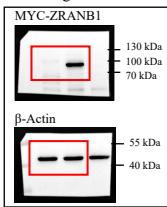

Figure S2C

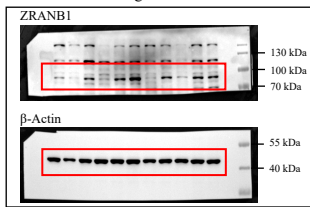

Figure S2L

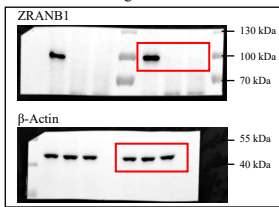

Figure S2M

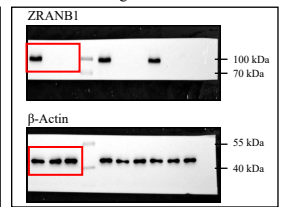

Supplement: JCB_202212072_SourceDataFS2.pdf [file JCB_202212072_SourceDataFS2.pdf]

Figure S3A

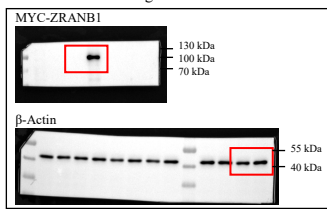

Figure S3B

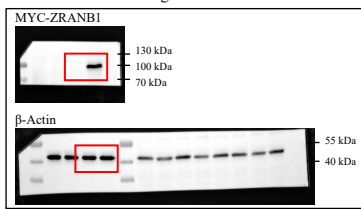

Supplement: JCB_202212072_SourceDataFS3.pdf [file JCB_202212072_SourceDataFS3.pdf]

Figure S4A

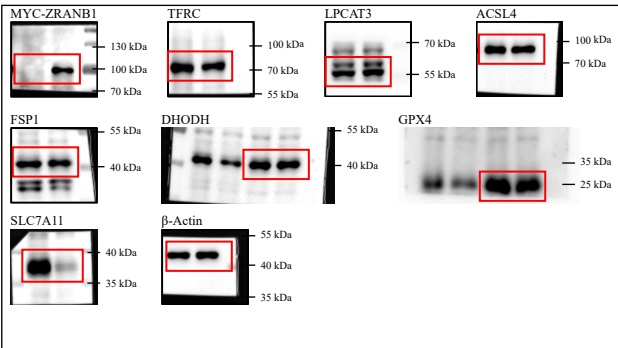

Figure S4F

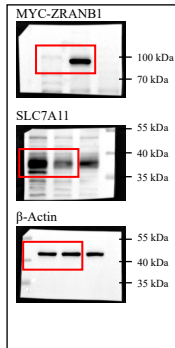

Figure S4H

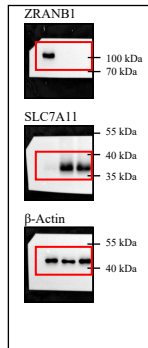

Figure S4I

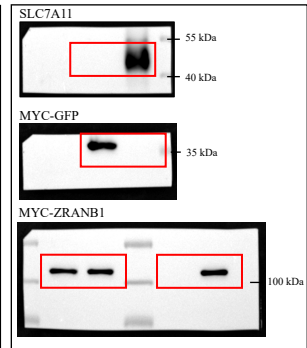

Figure S4J and N

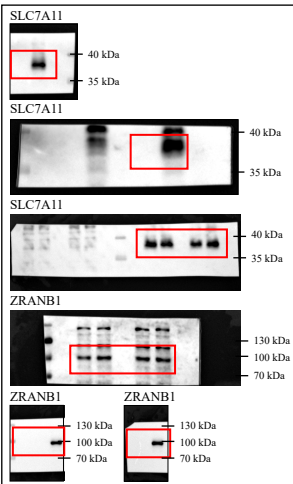

Figure S4K

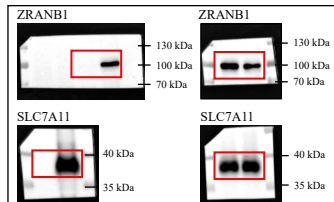

Figure S4L

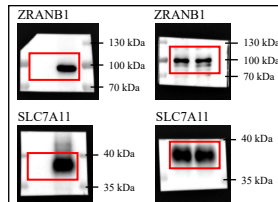

Figure S4M

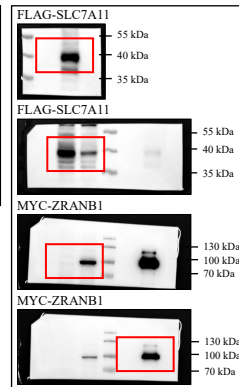

Supplement: JCB_202212072_SourceDataFS4.pdf [file JCB_202212072_SourceDataFS4.pdf]

Figure S6A

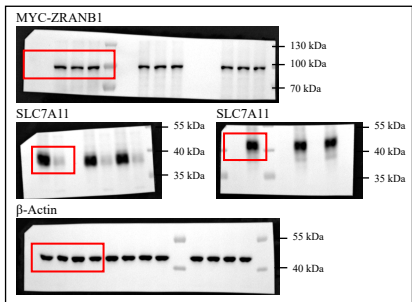

Figure S6I

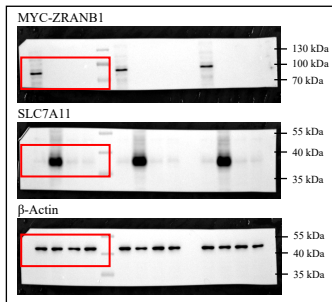

Supplement: JCB_202212072_SourceDataFS6.pdf [file JCB_202212072_SourceDataFS6.pdf]
